# Supplementary material for: Microbial Composition on Abandoned and Reclaimed Mining Sites in the Komi Republic (North Russia)
Source: MDPI journal article supplement (doi:10.3390/microorganisms11030720), 2023-03-10
Supplement: s1 [file s1]

Supplementary Table S1. Nutrition parameters of disturbed and reference soils.

| Group                   | BioRepeat | TOC  | pH  | P   | K   | N-<br>ammoniu<br>m | N-nitrate |
|-------------------------|-----------|------|-----|-----|-----|--------------------|-----------|
| Quarry Clay             | A         | 1.45 | 6.8 | 42  | 369 | 98.6               | 15.2      |
| Quarry Clay             | B         | 1.56 | 7   | 7.3 | 337 | 44.3               | 1.59      |
| Quarry Clay             | C         | 1.21 | 6.9 | 36  | 885 | 93                 | 12.4      |
| Primary Forest          | A         | 0.66 | 6.4 | 46  | 59  | 7.62               | 2.5       |
| Primary Forest          | B         | 0.87 | 5.9 | 52  | 188 | 10.3               | 2.24      |
| Primary Forest          | C         | 0.55 | 5.5 | 67  | 296 | 19.2               | 0.77      |
| Dumped Limestone        | A         | 1.22 | 7.3 | 4.7 | 785 | 3.76               | 0.73      |
| Dumped Limestone        | B         | 1.34 | 7.5 | 6.8 | 118 | 9.36               | 1.38      |
| Dumped Limestone        | C         | 1.12 | 7.4 | 2.1 | 240 | 4.26               | 4.65      |
| Secondary Forest        | A         | 1.45 | 7.3 | 3.4 | 205 | 13.4               | 10.6      |
| Secondary Forest        | B         | 1.65 | 7.2 | 1.3 | 188 | 17.5               | 1.08      |
| Secondary Forest        | C         | 1.45 | 7.2 | 3.4 | 181 | 15.7               | 1.08      |
| Reclamated<br>Limestone | A         | 1.65 | 7.2 | 0.9 | 77  | 19                 | 8.52      |
| Reclamated<br>Limestone | B         | 1.66 | 7.1 | 4.7 | 146 | 44.3               | 7.86      |
| Reclamated<br>Limestone | C         | 1.7  | 7.1 | 3.4 | 216 | 37.9               | 5.24      |
